# Supplementary material
Source: PubMed Central journal article supplement (PMC5784187)

S1 - Location of the 16 rivers used in the study. Dark dots denote populations with high heterogeneity in predator biomass, whereas light grey dots represent populations with low predator biomass heterogeneity.

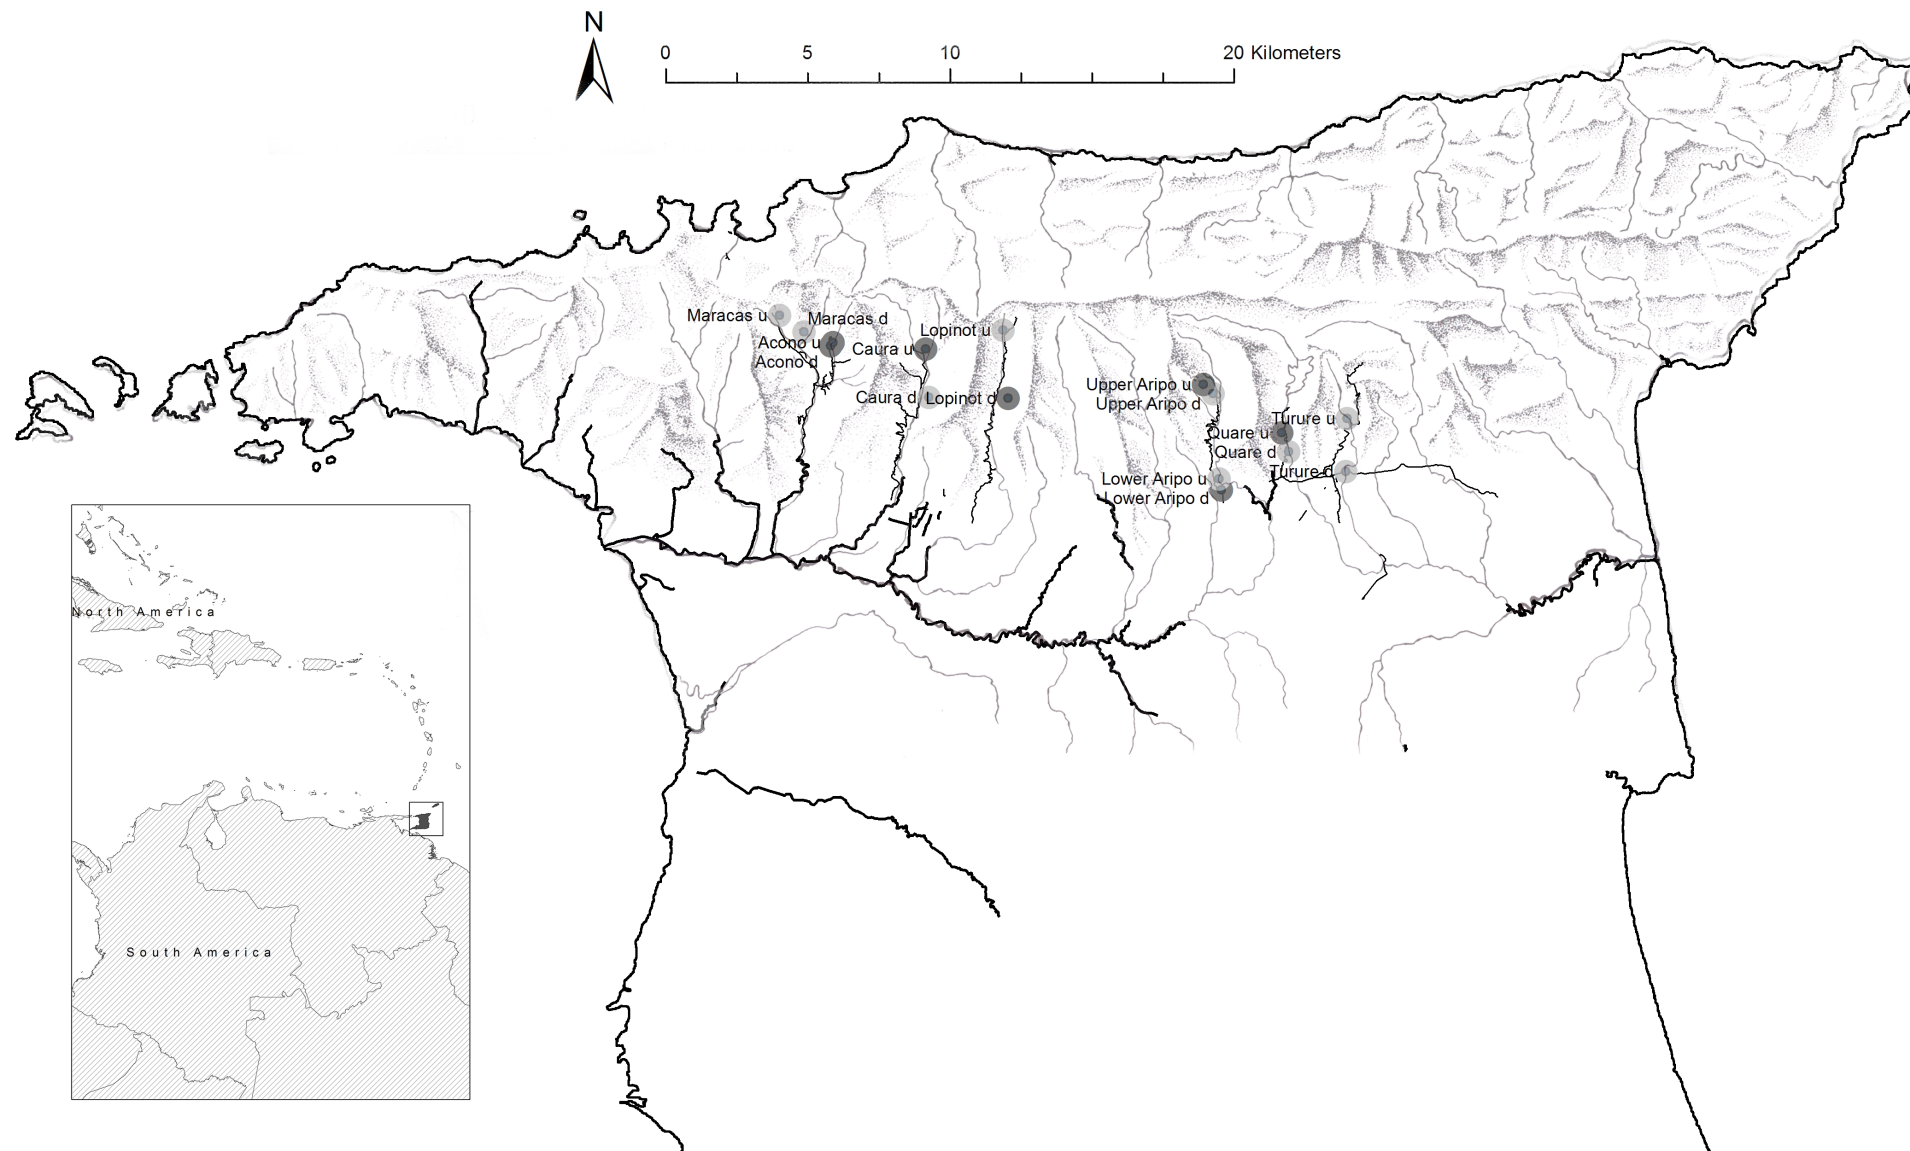

Supplement: rspb20171499supp1.pdf [file rspb20171499supp1.pdf]
