# Supplementary material
Source: PubMed Central journal article supplement (PMC5784187)
Supplement: rspb20171499supp2.pdf [file rspb20171499supp2.pdf]

S2 – Summary of estimates of variation in posterior mode for fixed effects (i.e. sex ratio treatment), for the estimates of variance for site and individuals and for residual variance. Values in parentheses indicate the 95% credible intervals.

| Sexual Behaviour          | Population groups                   |                                                     |                                                     |
|---------------------------|-------------------------------------|-----------------------------------------------------|-----------------------------------------------------|
|                           | Low Coefficient of Variation        | High Coefficient of Variation                       |                                                     |
|                           | Posterior mode ( $\pm$ CrI)         | Posterior mode ( $\pm$ CrI)                         |                                                     |
|                           | <b>Fixed effects</b>                |                                                     |                                                     |
|                           | Intercept                           | 1.772 (1.460: 2.066)                                | 1.598 (0.603: 2.565)                                |
|                           | Slope                               | 0.199 (0.133: 0.272)                                | 0.127 (-0.381: 0.723)                               |
|                           | <b>Variance estimates</b>           |                                                     |                                                     |
|                           | Among populations                   | 0.151 (0.065: 0.541)                                | -0.014 (3.86e <sup>-5</sup> : 3.909)                |
|                           | Within populations                  | 1.66e <sup>-4</sup> (3.31e <sup>-13</sup> : 0.020)  | -0.004 (1.58e <sup>-11</sup> : 1.323)               |
| Consensual Mating Display | Among individuals                   | 0.126 (0.087: 0.191)                                | 0.280 (0.170: 0.440)                                |
|                           | Within individuals                  | 4.01e <sup>-4</sup> (1.36e <sup>-10</sup> : 0.080)  | 0.191(0.088: 0.321)                                 |
|                           | <b>Residual Variance</b>            |                                                     |                                                     |
|                           | Even sex ratio                      | 0.288 (0.216: 0.361)                                | 0.392 (0.273: 0.602)                                |
|                           | Female sex ratio                    | 0.247 (0.134: 0.344)                                | 3.99e <sup>-3</sup> (7.16e <sup>-4</sup> : 0.098)   |
|                           | Male sex ratio                      | 0.217 (0.106: 0.330)                                | 4.47e <sup>-3</sup> (5.45e <sup>-4</sup> : 0.436)   |
|                           | <b>Covariance intercepts/slopes</b> | -4.93e <sup>-5</sup> (-0.010: 5.09e <sup>-3</sup> ) | 0.447 (-0.517: 0.687)                               |
|                           | <b>Fixed effects</b>                |                                                     |                                                     |
|                           | Intercept                           | 1.754 (1.563: 1.945)                                | 1.315 (0.838: 1.754)                                |
|                           | Slope                               | -0.069 (-0.168: 0.033)                              | -0.085 (-0.289: 0.154)                              |
|                           | <b>Variance estimates</b>           |                                                     |                                                     |
|                           | Among populations                   | 0.062 (0.020: 0.202)                                | -2.81e <sup>-3</sup> (2.32e <sup>-10</sup> : 0.848) |
|                           | Within populations                  | 0.012 (4.47e <sup>-08</sup> : 0.058)                | -5.80e <sup>-4</sup> (1.49e <sup>-12</sup> : 0.181) |
| Sneak Thrust              | Among individuals                   | 0.079 (0.050: 0.118)                                | 0.155 (0.059: 0.270)                                |
|                           | Within individuals                  | 3.11e <sup>-3</sup> (1.67e <sup>-10</sup> : 0.068)  | 4.02e <sup>-4</sup> (9.87e <sup>-11</sup> : 0.172)  |
|                           | <b>Residual Variance</b>            |                                                     |                                                     |
|                           | Even sex ratio                      | 0.180 (0.139: 0.233)                                | 0.432 (0.303: 0.669)                                |
|                           | Female sex ratio                    | 0.192 (0.113: 0.278)                                | 4.60e-3 (6.58e <sup>-4</sup> : 0.231)               |
|                           | Male sex ratio                      | 0.157 (0.081: 0.242)                                | 0.561 (0.279: 0.912714)                             |
|                           | <b>Covariance intercepts/slopes</b> | -6.15e <sup>-4</sup> (-0.029: 0.014)                | -0.733 (-0.081: 0.086)                              |

S2 – continued

| <b>Sexual Behaviour</b>             |                    | <b>Population groups</b>                           |                                                    |
|-------------------------------------|--------------------|----------------------------------------------------|----------------------------------------------------|
|                                     |                    | <b>Low mean</b>                                    | <b>High mean</b>                                   |
|                                     |                    | Posterior mode ( $\pm$ CrI)                        | Posterior mode ( $\pm$ CrI)                        |
| <b>Fixed effects</b>                |                    |                                                    |                                                    |
|                                     | Intercept          | 1.772 (1.460: 2.066)                               | 1.598 (0.603: 2.565)                               |
|                                     | Slope              | 0.199 (0.133: 0.272)                               | 0.127 (-0.381: 0.723)                              |
| <b>Variance estimates</b>           |                    |                                                    |                                                    |
|                                     | Among populations  | 0.259 (0.030: 1.197)                               | 0.076 (0.013: 0.343)                               |
|                                     | Within populations | 4.90e <sup>-3</sup> (2.45e <sup>-12</sup> : 0.053) | 5.45e <sup>-4</sup> (4.66e <sup>-10</sup> : 0.052) |
| Consensual Mating Display           | Among individuals  | 0.126 (0.087: 0.191)                               | 0.280 (0.170: 0.440)                               |
|                                     | Within individuals | 4.01e-3 (1.36e <sup>-10</sup> : 0.080)             | 0.191(0.088: 0.321)                                |
| <b>Residual Variance</b>            |                    |                                                    |                                                    |
|                                     | Even sex ratio     | 0.189 (0.135: 0.273)                               | 0.390 (0.297: 0.508)                               |
|                                     | Female sex ratio   | 0.191 (0.094: 0.295)                               | 0.069 (0.013: 0.255)                               |
|                                     | Male sex ratio     | 0.012 (1.70e <sup>-3</sup> : 0.226)                | 0.264 (0.110: 0.424)                               |
| <b>Covariance intercepts/slopes</b> |                    | -1.56e <sup>-3</sup> (-0.032: 0.015)               | 3.67e <sup>-4</sup> (-0.018: 0.024)                |
| <b>Fixed effects</b>                |                    |                                                    |                                                    |
|                                     | Intercept          | 1.754 (1.563: 1.945)                               | 1.315 (0.838: 1.754)                               |
|                                     | Slope              | -0.069 (-0.168: 0.033)                             | -0.085 (-0.289: 0.154)                             |
| <b>Variance estimates</b>           |                    |                                                    |                                                    |
|                                     | Among populations  | 0.137 (0.015: 0.884)                               | 0.031 (6.12e <sup>-3</sup> : 0.159)                |
|                                     | Within populations | 0.030 (3.34e <sup>-8</sup> : 0.226)                | 3.63e <sup>-4</sup> (3.44e <sup>-13</sup> : 0.022) |
| Sneak Thrust                        | Among individuals  | 0.079 (0.050: 0.118)                               | 0.155 (0.059: 0.270)                               |
|                                     | Within individuals | 0.0003 (1.67e <sup>-10</sup> : 0.068)              | 4.02e <sup>-3</sup> (9.87e <sup>-11</sup> : 0.172) |
| <b>Residual Variance</b>            |                    |                                                    |                                                    |
|                                     | Even sex ratio     | 0.203 (0.147: 0.294)                               | 0.275 (0.213: 0.366)                               |
|                                     | Female sex ratio   | 0.196 (0.083: 0.297)                               | 0.138 (0.047: 0.266)                               |
|                                     | Male sex ratio     | 0.172 (0.082: 0.261)                               | 0.351 (0.200: 0.486)                               |
| <b>Covariance intercepts/slopes</b> |                    | 0.013 (-0.113: 0.082)                              | 1.11e-4 (-4.38e <sup>-3</sup> : 0.014)             |
