# Supplementary material
Source: PubMed Central journal article supplement (PMC5784187)

S3. Frequency distribution in individual intercepts (a), slopes (b) and repeatability (c) for consensual mating displays (top), sneaking thrusts (bottom), in populations with high (dark grey) and low (light grey) coefficient of variation in predator biomass.

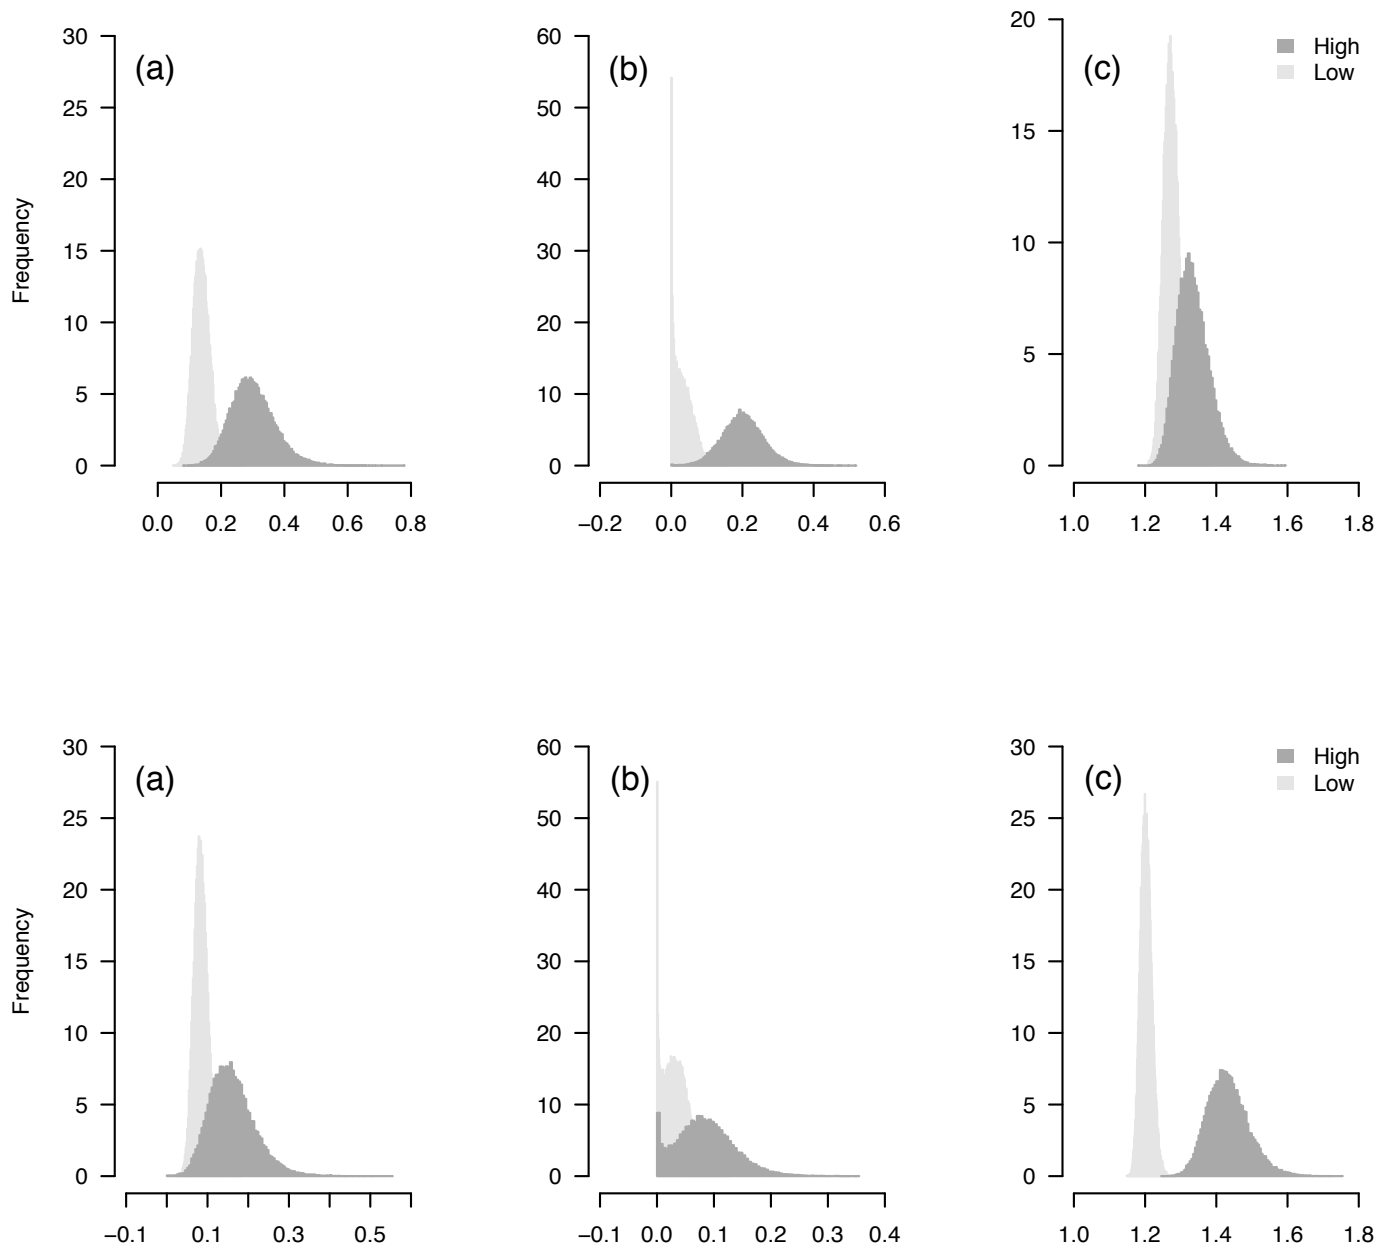

Supplement: rspb20171499supp3.pdf [file rspb20171499supp3.pdf]
