# Supplementary material
Source: PubMed Central journal article supplement (PMC5784187)

S5. Reaction norms in frequency of consensual mating displays (top) and sneak thrust (bottom) in response to differences in heterogeneity (a, c), or in mean of predator biomass population (a, c), or to mean differences in predator biomass (b, d).

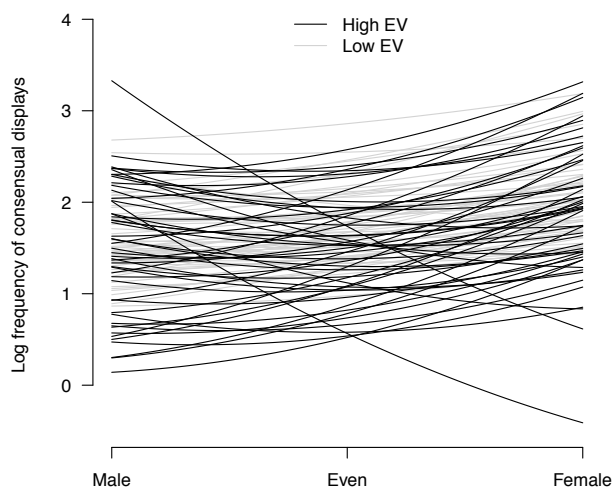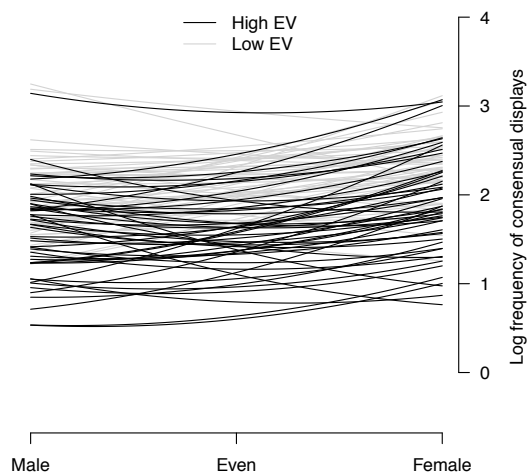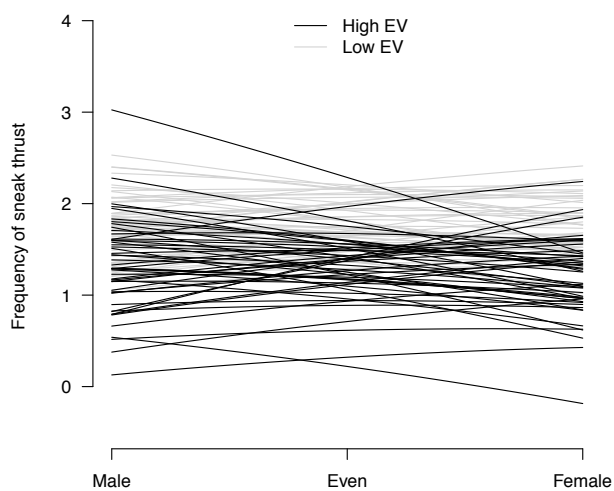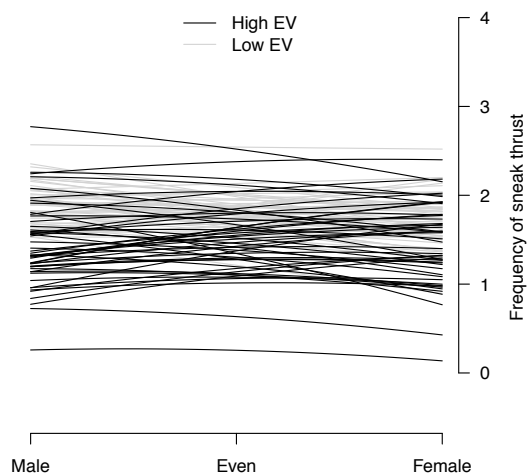

Supplement: rspb20171499supp5.pdf [file rspb20171499supp5.pdf]
