# Supplementary material
Source: PubMed Central journal article supplement (PMC5784187)
Supplement: rspb20171499supp6.pdf [file rspb20171499supp6.pdf]

S6 – Spearman correlation between predator biomass and operational sex ratio (OSR), and between predator biomass and population density of guppies, for each of the 16 populations. Correlation values for Turure u could not be calculated because of the lack of guppy predators in this population.

| Population    | OSR   | Population density |
|---------------|-------|--------------------|
| Acono d       | 0.99  | 0.63               |
| Acono u       | -0.20 | -0.08              |
| Caura d       | 0.00  | 0.21               |
| Caura u       | 0.80  | 0.16               |
| Lopinot d     | 0.99  | 0.88               |
| Lopinot u     | 0.40  | -0.30              |
| Lower Aripo d | -0.60 | 0.98               |
| Lower Aripo u | -0.99 | 0.57               |
| Maracas d     | 0.94  | 0.82               |
| Maracas u     | -0.20 | 0.85               |
| Quare d       | -0.40 | 0.66               |
| Quare u       | -0.80 | 0.87               |
| Turure d      | 0.80  | 0.50               |
| Turure u      | NA    | NA                 |
| Upper Aripo d | 0.20  | 0.14               |
| Upper Aripo u | 0.80  | 0.60               |
